# Supplementary material for: Genome-wide association study of SNP- and gene-based approaches to identify susceptibility candidates for lupus nephritis in the Han Chinese population
Source: Front Immunol. 2022 Oct 3;13:908851. doi: 10.3389/fimmu.2022.908851 (PMC9580327; doi:10.3389/fimmu.2022.908851)
Supplement: Supplementary file 2 [file Table_1.xlsx]

## Sheet: S1 Table 
S1 Table. The sequences of the primers in quantitative RT-PCR
18s	F	5'-GTAACCCGTTGAACCCCATT-3'
	R	5'-CCATCCAACGGTAGTAGCG-3'
ADCYAP1	F	5'-CCACTCGGACGGGATCTTC-3'
	R	5'-GCCGCCAAGTATTTCTTGACAG-3'
LINC00470	F	5'-ACCTAACCACTAATGACGCAAG-3'
	R	5'-GCTGCTCCTACTTTGCTGTTTTG-3'
TGFBR2	F	5'-AACATGGAAGAGTGCAACGAT-3'
	R	5'-CGTCACTTGGATAATGACCAACA-3'

## Sheet: S2 Table
S2 Table. Forty-four SNPs with P<1.0E-04 in discovery stage
SNP	Locus	Position	Minor allele	MAF in case	MAF in control	P	OR
rs10151371	14q31.3	88494575	A	0.1394	0.07506	9.9e-06	1.943
rs17798173	14q31.3	88543997	T	0.1377	0.07395	1.145e-05	1.94
rs8017161	14q32.32	103563195	G	0.3514	0.4448	1.224e-05	0.6662
rs17124022	14q31.3	88531526	C	0.1816	0.1104	1.279e-05	1.76
rs17203608	14q31.3	88546470	C	0.1371	0.07395	1.358e-05	1.93
rs11044004	12p12.3	18435452	T	0.2145	0.298	1.52e-05	0.6366
rs203339	12q24.23	120236754	T	0.451	0.3565	1.908e-05	1.485
rs12694817	2q36.3	230432705	C	0.3283	0.4189	1.939e-05	0.6735
rs4534639	12p12.3	18455200	A	0.2154	0.2969	2.375e-05	0.6435
rs1278879	14q12	32388216	C	0.3894	0.4823	2.735e-05	0.688
rs7958445	12p12.3	18386791	T	0.2219	0.3046	3.17e-05	0.6547
rs1405467	12q14.3	67556119	A	0.06166	0.1126	3.318e-05	0.5095
rs10435744	9p24.1	5486856	G	0.5017	0.4062	3.319e-05	1.445
rs9300698	13q33.1	102488287	T	0.06334	0.1137	3.718e-05	0.5074
rs7645232	3p25.1	14563237	A	0.174	0.2494	3.814e-05	0.6394
rs2378570	3q28	190154740	T	0.4019	0.3131	4.905e-05	1.464
rs17146331	5q23.1	119600027	T	0.3775	0.4647	5.161e-05	0.688
rs11650110	17p13.3	1209868	T	0.19	0.1239	5.376e-05	1.673
rs9851374	3q28	190157542	A	0.4164	0.3278	5.676e-05	1.453
rs538186	10q26.3	131039698	C	0.07373	0.1281	5.799e-05	0.5503
rs2870940	12q14.3	67564152	A	0.06081	0.1095	5.861e-05	0.5165
rs7660536	4q13.1	61907209	A	0.09544	0.1523	5.878e-05	0.5684
rs6744362	2p25.3	2531608	T	0.08361	0.1402	5.91e-05	0.565
rs893280	12q14.3	67555326	C	0.06419	0.1137	6.218e-05	0.5257
rs10210785	2q36.3	230391048	C	0.3133	0.3962	6.417e-05	0.6885
rs11826924	11p15.2	15301762	C	0.3497	0.4338	6.533e-05	0.6889
rs13049780	21q21.1	20716281	G	0.1867	0.1214	6.598e-05	1.659
rs13062154	3q29	194684216	T	0.1785	0.1159	6.814e-05	1.697
rs12606116	18p11.32	1443317	T	0.1993	0.2748	7.427e-05	0.665
rs7660017	4p14	38300473	A	0.08919	0.1459	7.473e-05	0.5754
rs10006348	4q13.1	61894078	G	0.09729	0.1533	8.106e-05	0.5755
rs7117666	11q14.2	87821219	C	0.4383	0.351	8.165e-05	1.422
rs485757	21q22.2	40926633	T	0.1174	0.1799	8.271e-05	0.6099
rs1556188	9p24.1	5486106	G	0.2272	0.3068	8.398e-05	0.6755
rs17132922	7p22.2	3097323	T	0.4374	0.5232	8.628e-05	0.7013
rs1363440	5q23.1	119581767	A	0.3691	0.4536	8.687e-05	0.697
rs10735940	12q14.3	67597983	C	0.06503	0.1137	9.155e-05	0.5362
rs10766227	11p15.2	15310981	T	0.3522	0.4349	9.234e-05	0.6954
rs3784616	15q21.1	48570578	T	0.4519	0.3681	9.292e-05	1.438
rs2242451	10p14	11302671	A	0.1436	0.2097	9.299e-05	0.63
rs2372192	3p14.1	65750652	G	0.4459	0.5342	9.595e-05	0.7094
rs433091	12q24.23	120228792	C	0.4899	0.4018	9.879e-05	1.418
rs12594698	15q21.1	48574956	T	0.451	0.3675	9.9e-05	1.435
rs7535432	1p34.3	38051585	A	0.3919	0.3113	9.932e-05	1.455
Notes: SNP: single-nucleotide polymorphism; MAF:minor allele frequency

## Sheet: S3 Table
S3 Table. A summary of results of 54 SNPs in discovery stage, SNP replication stage, and meta-analysis of the two stages
SNP	Locus	Position	GWAS					Replication		Meta
			Minor allele	MAF in case	MAF in control	P	OR	P	OR	P	OR
rs12606116	18p11.32	1443317	T	0.1993	0.2748	7.427e-05	0.665	0.04169	0.6999	8.721e-06	0.6738
rs11826924	11p15.2	15301762	C	0.3497	0.4338	6.533e-05	0.6889	0.09128	0.7633	1.711e-05	0.7071
rs203339	12q24.23	120236754	T	0.451	0.3565	1.908e-05	1.485	0.2661	1.183	2.368e-05	1.3958
rs10151371	14q31.3	88494575	A	0.1394	0.07506	9.9e-06	1.943	0.4585	1.216	2.593e-05	1.7318
rs17124022	14q31.3	88531526	C	0.1816	0.1104	1.279e-05	1.76	0.4505	1.187	3.148e-05	1.5976
rs10435744	9p24.1	5486856	G	0.5017	0.4062	3.319e-05	1.445	0.3046	1.171	3.931e-05	1.3714
rs433091	12q24.23	120228792	C	0.4899	0.4018	9.879e-05	1.418	0.1426	1.253	4.03e-05	1.3742
rs7157731	14q32.2	100935129	G	0.3269	0.4051	0.0002289	0.7094	0.1288	0.7818	7.774e-05	0.7267
rs17146331	5q23.1	119600027	T	0.3775	0.4647	5.161e-05	0.688	0.3699	0.874	8.949e-05	0.7347
rs6497419	16p13.2	9808900	T	0.04584	0.01438	0.0001184	3.376	0.1917	1.742	0.0001098	2.6674
rs4781919	16p12.3	17924964	G	0.2323	0.3068	0.0001834	0.6916	0.2118	0.8083	0.0001119	0.7192
rs12349082	9q33.3	125938798	C	0.3666	0.4469	0.0002045	0.715	0.1954	0.8176	0.0001128	0.7396
rs2372192	3p14.1	65750652	G	0.4459	0.5342	9.595e-05	0.7094	0.4264	0.891	0.0001783	0.7542
rs6981616	8q21.3	90708428	T	0.1765	0.2417	0.0001753	0.6579	0.3954	0.8394	0.0002125	0.6953
rs4781927	16p12.3	17896381	T	0.2644	0.3355	0.0004711	0.7153	0.181	0.8019	0.0002196	0.7362
rs10513846	3q28	190030989	A	0.5034	0.4216	0.0002898	1.388	0.2679	1.189	0.0002231	1.335
rs476628	10q26.3	131041657	G	0.07601	0.128	0.0001142	0.5669	0.4881	0.853	0.0002923	0.6386
rs1010258	6q11.1	62876585	T	0.3421	0.4205	0.0001925	0.7044	0.413	0.8809	0.0003039	0.7481
rs2378570	3q28	190154740	T	0.4019	0.3131	4.905e-05	1.464	0.8623	1.028	0.0003184	1.3395
rs160449	8q21.3	90660515	A	0.2111	0.2826	0.0001263	0.6691	0.6734	0.9227	0.0003655	0.7208
rs1436649	3q28	189946318	G	0.4358	0.3565	0.0002303	1.419	0.4239	1.131	0.0003828	1.3328
rs1405467	12q14.3	67556119	A	0.06166	0.1126	3.318e-05	0.5095	0.9508	1.017	0.0004084	0.6104
rs3824535	9q33.2	125683856	T	0.3108	0.3863	0.0002672	0.7083	0.4961	0.8943	0.000469	0.7507
rs3784616	15q21.1	48570578	T	0.4519	0.3681	9.292e-05	1.438	0.7994	1.041	0.0004803	1.3222
rs12108988	5q23.1	119615110	A	0.4324	0.5177	0.0001326	0.711	0.7129	0.9464	0.000517	0.7663
rs12594698	15q21.1	48574956	T	0.451	0.3675	9.9e-05	1.435	0.829	1.034	0.0005445	1.3181
rs538186	10q26.3	131039698	C	0.07373	0.1281	5.799e-05	0.5503	0.9718	0.9919	0.0007037	0.6558
rs2870940	12q14.3	67564152	A	0.06081	0.1095	5.861e-05	0.5165	0.7773	1.088	0.0007222	0.6147
rs7117666	11q14.2	87821219	C	0.4383	0.351	8.165e-05	1.422	0.8672	0.9738	0.0008019	1.298
rs7660536	4q13.1	61907209	A	0.09544	0.1523	5.878e-05	0.5684	0.8308	1.051	0.0009025	0.6713
rs218899	8q21.3	90729507	A	0.2829	0.3598	0.0001578	0.6933	0.962	0.9919	0.0009461	0.757
rs485757	21q22.2	40926633	T	0.1174	0.1799	8.271e-05	0.6099	0.8415	1.044	0.00099	0.7
rs10735940	12q14.3	67597983	C	0.06503	0.1137	9.155e-05	0.5362	0.7415	1.093	0.001378	0.6449
rs7645232	3p25.1	14563237	A	0.174	0.2494	3.814e-05	0.6394	0.4871	1.135	0.001456	0.743
rs2046266	2p24.3	13366874	A	0.3015	0.3819	0.000121	0.6958	0.8147	1.037	0.001517	0.774
rs8032357	15q21.1	48618819	G	0.4738	0.3996	0.0006279	1.366	0.6922	1.065	0.001547	1.2845
rs9383032	6p23	15163801	A	0.2627	0.1921	0.0001367	1.519	0.8318	0.9617	0.001562	1.347
rs11176591	12q14.3	67526887	G	0.0625	0.1082	0.0001219	0.5296	0.6606	1.139	0.001681	0.6353
rs870009	5q23.1	119600902	G	0.4306	0.3532	0.0005314	1.364	0.7705	1.046	0.001693	1.2754
rs6867625	5q23.1	119659058	A	0.5279	0.4492	0.0005046	1.362	0.7835	0.9607	0.00185	1.2665
rs1332339	9p21.2	25956931	T	0.3015	0.2329	0.0004767	1.427	0.9811	1.004	0.002502	1.3032
rs11044004	12p12.3	18435452	T	0.2145	0.298	1.52e-05	0.6366	0.1409	1.296	0.003001	0.7661
rs7958445	12p12.3	18386791	T	0.2219	0.3046	3.17e-05	0.6547	0.1718	1.274	0.003421	0.7723
rs10209739	2p24.3	13372691	G	0.2922	0.3709	0.0001555	0.6982	0.5509	1.098	0.003451	0.7885
rs12900251	15q14	37336685	C	0.2804	0.213	0.0003904	1.461	0.7793	0.9513	0.003811	1.304
rs17124028	14q31.3	88545152	G	0.2323	0.1692	0.0004466	1.488	0.621	0.9065	0.005034	1.3176
rs9300698	13q33.1	102488287	T	0.06334	0.1137	3.718e-05	0.5074	0.1694	1.431	0.005833	0.6813
rs2362556	16p12.3	17950351	T	0.4856	0.4346	0.02381	1.216	0.1387	1.258	0.00706	1.2259
rs1278879	14q12	32388216	C	0.3894	0.4823	2.735e-05	0.688	0.02879	1.401	0.0112	0.8222
rs7855710	9q33.1	118542030	C	0.1968	0.2682	0.0001437	0.6699	0.1421	1.301	0.01127	0.7943
rs6493318	15q21.1	48568259	T	0.4654	0.5243	0.007376	0.786	0.9996	1	0.01997	0.8339
rs13403000	2p24.3	13368225	T	0.1303	0.1744	0.005142	0.7087	0.8581	1.038	0.02051	0.7823
rs2984835	13q33.1	102486443	C	0.07517	0.1236	0.0001694	0.559	0.08346	1.55	0.02106	0.7376
rs3816668	8p23.1	11406593	C	0.0736	0.07506	0.8857	0.9761	0.5932	1.156	0.8737	1.023
Notes: SNP: single-nucleotide polymorphism; MAF:minor allele frequency

## Sheet: S4 Table
S4 Table. Six hundred and ninety genes with P<0.05 in the gene-based analysis
Chr	Gene	nSNPs	Start	Stop	Pvalue	TopSNP	TopSNP.pvalue
14	LINC01146	15	88490893	88553688	1.2e-05	rs10151371	3.68e-06
3	TMEM207	6	190146443	190167665	3e-05	rs2378570	2.93e-05
3	FETUB	3	186358148	186370797	0.000121	rs4686434	0.0001431
3	CLDN1	5	190023489	190040235	0.000176	rs10513846	0.000206
5	EFNA5	78	106712589	107006596	0.000179	rs164699	0.0009035
9	ZBTB26	2	125680377	125693779	0.000212	rs3824535	0.0003159
12	CIT	19	120123594	120315095	0.000278	rs203339	1.34e-05
14	WDR25	9	100842754	100996640	0.000339	rs7157731	0.0002242
9	RABGAP1	8	125703287	125867147	0.000447	rs10818781	0.0003001
1	GNL2	5	38032412	38061586	0.000449	rs7535432	0.0001373
18	DLGAP1-AS3	2	3878179	3897069	0.000517999	rs4798141	0.00187
15	SLC12A1	30	48498497	48596275	0.000734999	rs3784616	0.0001197
12	GNPTAB	12	102139274	102224645	0.000798999	rs10860790	0.001096
11	RPLP2	2	809935	812876	0.00106999	rs4131364	0.0004438
16	LONP2	2	48278210	48387407	0.00117999	rs12446160	0.002295
3	GNAI2	2	50264119	50296786	0.00117999	rs2282751	0.0004692
15	GABRG3	155	27216428	27778373	0.00122999	rs11635983	0.001739
6	KHDRBS2	81	62389864	62996100	0.00129999	rs1010258	0.0002426
11	PIDD1	2	799178	805250	0.00130999	rs10902221	0.001587
12	SLC26A10	2	58013692	58019934	0.00137999	rs7294447	0.0003117
9	STRBP	6	125883907	126030855	0.00142999	rs12349082	0.0002062
17	KSR1	31	25799035	25950718	0.00146999	rs2945387	0.001044
7	LHFPL3-AS2	5	104535074	104567092	0.00153998	rs2041830	0.005065
2	LOC100507600	2	136577760	136580657	0.00179998	rs2164210	0.001052
14	VTI1B	2	68117866	68141602	0.00199998	rs11623700	0.002103
3	GRIP2	14	14530618	14581850	0.00202998	rs7645232	2.42e-05
12	PTHLH	6	28111016	28124916	0.00218998	rs10492364	0.001111
7	ETV1	34	13930855	14031050	0.00219998	rs2073533	0.006129
17	ULK2	8	19674142	19771239	0.00240998	rs157407	0.002
8	SLC7A2	23	17354596	17428077	0.00241998	rs6997118	0.0002268
16	MIR548AE2	3	48274602	48420559	0.00250997	rs12446160	0.002295
22	PHF21B	44	45277042	45405809	0.00250997	rs6007396	0.0008348
16	ZNF778	4	89284110	89295965	0.00263997	rs11076775	0.01011
10	TMEM72	9	45406763	45430642	0.00265997	rs932986	0.002175
19	CYP2A6	2	41349442	41356352	0.00266997	rs4514794	0.002296
8	LACTB2	4	71549500	71581447	0.00283997	rs268629	0.001543
10	ANXA2P3	2	66585284	66586634	0.00286997	rs16920432	0.002993
11	CASP4	3	104813593	104839325	0.00293997	rs577625	0.003922
8	LOC286190	4	71520811	71575513	0.00304997	rs268629	0.001543
8	EPHX2	25	27348518	27402439	0.00323997	rs4149255	0.001616
2	DNER	86	230222344	230579286	0.00328997	rs12694817	2.14e-05
19	SHKBP1	3	41082756	41097305	0.00330997	rs814518	0.00368
8	TRAM1	3	71485452	71520694	0.00334997	rs268598	0.001371
11	OOSP2	3	59807747	59815516	0.00340997	rs10501381	0.006548
19	RAB8A	4	16222489	16244445	0.00344997	rs10419562	0.001343
10	FAM13C	17	61005888	61122661	0.00348997	rs753672	0.0004571
19	RYR1	26	38924339	39078204	0.00351996	rs7246912	0.0009162
12	SRRM4	65	119419299	119600856	0.00358996	rs11064681	0.0001766
12	SH2B3	3	111843751	111889427	0.00370996	rs739496	0.004428
10	FRMD4A	280	13685705	14372866	0.00372996	rs12778125	0.0003599
7	FBXL18	10	5515427	5553399	0.00388996	rs10807949	0.001852
8	TNFRSF10C	7	22960326	22974950	0.00391996	rs11785284	0.002145
1	LINC00582	8	231727037	231747836	0.00405996	rs1765777	0.001522
9	NCS1	21	132934856	132999583	0.00414996	rs1009502	0.0006392
21	BTG3	2	18965967	18985268	0.00438996	rs9977638	0.001718
8	PCAT2	6	128084938	128094466	0.00438996	rs1016343	0.002773
1	FMO2	11	171154387	171181822	0.00441996	rs7512785	0.003469
6	SERAC1	9	158530535	158589312	0.00442996	rs6929274	0.001353
1	MEAF6	5	37955560	37980420	0.00444996	rs4653296	0.003973
15	STOML1	4	74275558	74286963	0.00445996	rs3816197	0.0005772
8	SAMD12-AS1	18	119633239	119738306	0.00454995	rs2460983	0.005301
1	TADA1	4	166825748	166845654	0.00457995	rs6675750	0.00144
1	LAX1	2	203734283	203745480	0.00473995	rs3737973	0.01262
8	PRNCR1	6	128092118	128104840	0.00483995	rs1016343	0.002773
2	ZNF804A	31	185463092	185804214	0.00485995	rs1366840	0.001654
10	TMEM72-AS1	31	45306471	45455137	0.00499995	rs932986	0.002175
12	GUCY2C	6	14765567	14849519	0.00511995	rs2287538	0.007777
11	INSC	38	15133969	15268756	0.00516995	rs2156827	0.002637
8	KCNU1	11	36641841	36793643	0.00553994	rs2211720	0.001922
12	DPY19L2	3	63952692	64062354	0.00557994	rs3855610	0.001505
20	SPINT3	2	44141100	44144264	0.00564994	rs6130852	0.007025
6	LINC01010	18	134758853	134825158	0.00566994	rs2327478	0.002491
1	ZC3H11A	13	203764750	203823256	0.00582994	rs10494844	0.001365
21	COL6A2	14	47518032	47552763	0.00596994	rs2839117	0.0005622
6	SLC35B2	2	44221837	44225627	0.00609994	rs1875324	0.002689
2	DARS	2	136664253	136743222	0.00618994	rs309160	0.001146
3	FGD5	41	14860468	14976072	0.00618994	rs9822464	0.00252
16	PRDM7	3	90122973	90142338	0.00628994	rs2078478	0.006422
22	HORMAD2	6	30476452	30573062	0.00631994	rs2412971	0.002997
14	BEGAIN	2	101003483	101036131	0.00637994	rs4074037	0.001362
8	C8orf88	4	91970705	91997485	0.00650993	rs1386111	0.00566
5	RANBP3L	8	36249103	36302011	0.00660993	rs716636	0.00441
13	RNF219	6	79188420	79233314	0.00662993	rs12585725	0.004036
11	SLC17A6	18	22359666	22401046	0.00667993	rs7107169	0.002781
3	CEP63	5	134204574	134293855	0.00682993	rs12636917	0.005721
2	GYPC	5	127413510	127454251	0.00687993	rs1866658	0.007345
8	SNTG1	120	50822348	51706678	0.00687993	rs4873466	0.001923
12	NAA25	5	112464492	112546635	0.00694993	rs2339941	0.01156
12	TMEM233	6	120031263	120079363	0.00699993	rs2893796	0.006322
9	LOC100128505	7	119266561	119324572	0.00708993	rs1861881	0.0008211
2	LCT	9	136545414	136594750	0.00722993	rs2164210	0.001052
1	ZBED6	3	203766650	203769590	0.00723993	rs7552670	0.001365
2	ANAPC1P1	2	87088947	87122165	0.00730993	rs6709175	0.001373
11	VPS26B	3	134094560	134117686	0.00734993	rs4362160	0.00413
12	LOC283352	3	129594234	129597843	0.00752992	rs10847773	0.007809
20	MKKS	8	10385427	10414887	0.00761992	rs1547	0.004005
22	LOC100506472	2	39828164	39833133	0.00764992	rs5750824	0.001819
14	OXA1L	3	23235730	23240998	0.00769992	rs8572	0.006388
13	TMTC4	20	101256089	101327189	0.00770992	rs1572641	0.005033
5	PCDHB3	2	140479829	140483406	0.00773992	rs31849	0.01682
22	TAB1	2	39795758	39833132	0.00782992	rs5750824	0.001819
1	SARS	3	109756514	109780804	0.00799992	rs685653	0.008666
4	HSD17B13	5	88224940	88244058	0.00828992	rs13112695	0.006943
17	ZMYND15	2	4643309	4649414	0.00848992	rs2271165	0.02173
14	PARP2	3	20811772	20826063	0.00869991	rs3093930	0.0022
7	ACTR3C	3	149944300	150020758	0.00874991	rs17837498	0.005781
15	KNSTRN	3	40674921	40686489	0.00885991	rs7164132	0.01785
19	NUCB1-AS1	2	49414186	49422148	0.00895991	rs746075	0.002181
5	LOC102546227	18	96840399	97006755	0.0089991	rs990698	0.004697
14	C14orf105	2	57936017	57960581	0.00909909	rs7150496	0.01077
15	NUSAP1	3	41624891	41673248	0.00919908	rs919961	0.00984
17	ABCA10	22	67144147	67240956	0.00939906	rs997639	0.005922
4	SNCA	18	90645249	90759447	0.00939906	rs3775442	0.000498
19	ZNF772	3	57980953	57988938	0.00949905	rs2360764	0.003852
19	ZNF816	3	53452631	53466164	0.00949905	rs11084211	0.01112
1	PRKACB	15	84543744	84704181	0.00949991	rs1565823	0.005699
19	NUCB1	4	49403306	49426540	0.00959904	rs746075	0.002181
4	RASSF6	6	74437266	74486348	0.00959904	rs2010989	0.001062
6	TRAM2	28	52362199	52441862	0.00959904	rs2268722	0.008502
16	LINC00922	57	65318401	65610203	0.0096399	rs818401	0.001238
17	AFMID	3	76183397	76203782	0.00969903	rs7221585	0.01104
3	TM4SF18	5	149036284	149051548	0.00969903	rs7634903	0.01552
6	ARID1B	72	157099063	157531913	0.00969903	rs10457101	0.00135
1	SPATA21	6	16725137	16763919	0.0098499	rs4661747	0.001574
1	FAM69A	9	93298285	93427079	0.00989901	rs10782946	0.002308
11	MS4A13	4	60282885	60310191	0.009999	rs10897077	0.00227
12	BCL7A	7	122459860	122499950	0.010099	rs1916334	0.0006481
8	RIPK2	8	90769974	90803292	0.010099	rs9297722	0.003025
10	USP6NL	17	11502508	11653679	0.010199	rs4445554	0.002841
11	DDX25	3	125774260	125793006	0.010199	rs683155	0.005275
11	GPR83	3	94110476	94134585	0.010299	rs3740868	0.004506
6	MEP1A	8	46761093	46807519	0.010299	rs1410825	0.01034
11	ACAD8	2	134123433	134135746	0.010499	rs11223738	0.007784
16	DOK4	3	57505869	57520385	0.010499	rs496772	0.01111
2	CCDC141	47	179694483	179914786	0.010499	rs10497528	0.0005815
2	GAL3ST2	2	242716239	242743702	0.010499	rs9973663	0.00361
12	ATXN2	6	111890017	112037480	0.0105989	rs2301621	0.008904
16	MT4	2	56598960	56602869	0.0105989	rs396230	0.01556
9	SLC31A1	11	115983807	116026772	0.0106989	rs10513189	0.008938
19	TULP2	3	49384221	49401996	0.0107989	rs10420053	0.007094
3	IQCB1	8	121488609	121553926	0.0107989	rs6438678	0.00926
3	LRRC31	8	169557028	169587723	0.0107989	rs7647589	0.005204
5	FAM169A	10	74073398	74162663	0.0107989	rs6453083	0.002247
17	ENO3	2	4854383	4860426	0.0108989	rs238239	0.005618
17	SHISA6	103	11144739	11467380	0.0110989	rs7208665	0.003804
9	CTSL3P	3	90387829	90401799	0.0110989	rs10123732	0.005363
1	ERICH3	16	75033794	75139422	0.0112989	rs699856	0.005246
1	OR10X1	2	158548708	158549689	0.0112989	rs863362	0.01295
5	LOC102467225	7	117931882	117963787	0.0113989	rs10519559	0.006054
7	CNPY1	10	155293952	155326539	0.0113989	rs6971850	0.004545
19	CCL25	5	8117645	8127547	0.0114989	rs2032887	0.01669
8	LRRC69	20	92114846	92231464	0.0114989	rs4419778	0.009962
22	PDGFB	7	39619684	39640957	0.0115988	rs9622978	0.008752
4	BANK1	48	102711763	102995969	0.0117988	rs2631268	0.002691
9	REXO4	4	136271181	136283292	0.0117988	rs4962145	0.006929
17	FASN	2	80036213	80056106	0.0118988	rs4246444	0.03206
9	PLIN2	2	19115758	19127604	0.0118988	rs3802335	0.005755
19	EHD2	4	48216600	48246391	0.0119988	rs10405280	0.002514
1	LRRN2	18	204586302	204654597	0.0119988	rs4951090	0.005832
5	LOC100506526	2	61028616	61031525	0.0119988	rs6873285	0.008672
11	SLC22A12	2	64358281	64369825	0.0120988	rs476037	0.006316
22	EIF3L	3	38245378	38284789	0.0122988	rs139842	0.01153
4	GLRA3	39	175563161	175750466	0.0122988	rs4695789	0.003353
11	CWF19L2	16	107197071	107328572	0.0123988	rs11212182	0.0006626
22	MB	5	36002810	36019401	0.0123988	rs2899254	0.0174
19	SLC8A2	14	47931278	47975307	0.0124988	rs830160	0.002536
16	PPL	12	4932507	4987136	0.0125987	rs7200819	0.004855
11	SIRT3	8	215029	236362	0.0126987	rs511744	0.001341
1	TPRG1L	2	3541555	3546694	0.0126987	rs4648538	0.0105
1	WDR3	3	118472371	118503049	0.0127987	rs12075590	0.002864
13	ABHD13	2	108870762	108886603	0.0128987	rs9520823	0.006322
8	DPYSL2	48	26371708	26515693	0.0128987	rs10088957	0.0004099
12	PTPN11	3	112856535	112947717	0.0129987	rs11066322	0.01156
17	ZNF18	2	11880761	11900689	0.0130987	rs10852800	0.03456
13	LINC00284	2	44596470	44604599	0.0131987	rs4942267	0.01041
14	ARG2	3	68086578	68118436	0.0131987	rs10483801	0.003419
2	CD8A	2	87011727	87035519	0.0132987	rs6753271	0.02245
5	PCDH12	6	141323149	141338627	0.0132987	rs108042	0.00693
4	PRIMPOL	2	185570766	185616112	0.0133987	rs2696051	0.02591
12	ACAD10	5	112123856	112194911	0.0134987	rs627308	0.01304
22	CHEK2	8	29083730	29137822	0.0134987	rs4035540	0.01045
22	LOC101929664	6	30404730	30476469	0.0134987	rs41177	0.00493
8	NECAB1	21	91803920	91971630	0.0135986	rs997898	0.003454
21	CLIC6	9	36041687	36090519	0.0136986	rs2834601	0.002186
11	MS4A3	6	59824100	59838588	0.0137986	rs11824940	0.01288
2	CYP27A1	11	219646471	219680016	0.0137986	rs4674345	0.00659
12	ACTR6	2	100593864	100618202	0.0138986	rs17030054	0.01043
17	ST6GALNAC2	4	74561460	74582145	0.0138986	rs2120886	0.001219
20	SLX4IP	30	10415950	10604027	0.0143986	rs628473	0.00431
2	ITM2C	5	231729312	231743969	0.0143986	rs4972973	0.002553
8	MATN2	58	98881310	99048946	0.0143986	rs2444871	0.0002969
12	KRT78	2	53232745	53242778	0.0144986	rs2013335	0.004214
14	AREL1	5	75127954	75179807	0.0144986	rs10162454	0.0007255
8	RNF122	3	33405271	33424646	0.0144986	rs9297209	0.009981
9	TTF1	7	135250936	135282238	0.0144986	rs3739916	0.01871
2	LINC01119	17	47055002	47086145	0.0146985	rs9225	0.0006417
6	GCLC	15	53362139	53409927	0.0148985	rs4715407	0.003946
3	IQSEC1	39	12938541	13114617	0.0149985	rs12489038	0.005259
8	OTUD6B-AS1	3	92072133	92082417	0.0152985	rs10110267	0.01388
3	MAGI1	178	65339905	66024509	0.0153985	rs2372192	6.29e-05
10	HOGA1	7	99344101	99372555	0.0154985	rs1010931	0.006824
4	AFF1	29	87856153	88062206	0.0154985	rs2053769	0.008277
1	TOR1AIP2	2	179809101	179846941	0.0155984	rs7411457	0.01448
16	CRAMP1L	6	1664640	1727909	0.0156984	rs2076417	0.003267
19	ZNF416	2	58082933	58090243	0.0156984	rs12977037	0.004098
22	CECR6	2	17597188	17602257	0.0158984	rs738033	0.009634
15	PML	9	74287013	74340155	0.0162984	rs1078555	0.001826
9	NANS	4	100818958	100845365	0.0162984	rs4237190	0.0117
11	C11orf97	9	94245694	94265289	0.0163984	rs11020808	0.002841
3	MAGI1-AS1	5	65879490	65910972	0.0163984	rs1552966	0.009324
2	CSRNP3	35	166326156	166545917	0.0165983	rs777341	0.0009446
3	DCLK3	3	36753912	36781352	0.0165983	rs2063159	0.007233
11	LOC100130987	7	67085309	67159158	0.0166983	rs1944096	0.009787
10	ANXA11	10	81914879	81965433	0.0168983	rs2819941	0.01033
12	RHNO1	3	2985423	2998691	0.0169983	rs1860433	0.008575
2	PQLC3	3	11295497	11318998	0.0169983	rs3732103	0.01414
8	EFCAB1	2	49627473	49647870	0.0169983	rs966703	0.01004
10	LOC283070	2	12875132	12877545	0.0170983	rs13674	0.00414
12	UHRF1BP1L	8	100430862	100536642	0.0171983	rs7305297	0.0108
14	RPS6KA5	27	91337166	91526993	0.0172983	rs3783834	0.003006
17	NUP85	4	73201596	73231854	0.0172983	rs11657106	0.01564
2	OSBPL6	47	179059207	179264160	0.0172983	rs7564722	0.002543
17	TADA2A	5	35766976	35837226	0.0173983	rs853231	0.01099
4	WHSC1	2	1873122	1983934	0.0173983	rs487903	0.01062
4	SCOC	16	141178439	141303710	0.0175982	rs11945466	0.008601
10	LINC00700	4	2047666	2056542	0.0176982	rs1414125	0.0165
2	BOK	3	242498145	242513553	0.0176982	rs7558942	0.002238
15	PLEKHO2	5	65134081	65160201	0.0177982	rs1043690	0.01174
11	KDM2A	12	66886739	67025550	0.0178982	rs12288048	0.002409
14	LOC100506476	2	74254062	74270331	0.0178982	rs9788450	0.01242
8	ADAM9	19	38854504	38962779	0.0178982	rs4733905	0.008838
5	PCDHB2	2	140474190	140476964	0.0179982	rs31853	0.01682
12	WDR66	9	122356462	122441832	0.0180982	rs1169072	0.004942
3	ASTE1	2	130732716	130745698	0.0180982	rs218503	0.01945
16	NDE1	9	15737123	15820208	0.0182982	rs6498567	0.009447
11	STT3A	7	125462689	125492654	0.0187981	rs11220153	0.005956
4	LOC100129858	14	141204879	141294546	0.0187981	rs11945466	0.008601
20	LOC101929526	2	18655038	18679352	0.0188981	rs6136469	0.01255
2	GKN1	2	69201704	69208112	0.0188981	rs13424275	0.0191
2	KLHL30	4	239047362	239061547	0.0188981	rs7602358	0.02706
1	LOC100996702	3	113362790	113393265	0.0189981	rs12082284	0.01683
5	OTULIN	4	14664782	14699842	0.0190981	rs31925	0.02776
16	MVP	5	29831714	29859360	0.0191981	rs2288043	0.005015
4	CLGN	3	141309606	141348815	0.0191981	rs12513290	0.002826
12	HECTD4	18	112597991	112819896	0.0192981	rs1468253	0.009828
14	CEP170B	4	105331649	105363107	0.0193981	rs4983561	0.009928
16	C16orf78	7	49407807	49433319	0.0193981	rs27795	0.006632
1	SGIP1	44	66999824	67210768	0.0193981	rs1408852	0.000713
11	OR51E2	10	4701400	4719076	0.0194981	rs1505194	0.005195
17	SLC16A13	2	6939393	6943440	0.0194981	rs11078663	0.01091
4	CORIN	35	47596014	47840123	0.019698	rs16860440	0.0054
7	ORAI2	3	102073976	102097268	0.019698	rs12669274	0.01041
19	ZNF816-ZNF321P	6	53430387	53466164	0.019798	rs11084211	0.01112
8	CYP11B1	5	143953772	143961236	0.019898	rs1134096	0.02538
19	ZNF841	6	52567718	52599018	0.019998	rs1560690	0.008521
8	LGI3	2	22004342	22014344	0.019998	rs12679786	0.01937
20	EIF6	2	33866708	33872619	0.020198	rs2250205	0.01719
6	GPR126	8	142623055	142767403	0.020198	rs9496346	0.002599
10	CPXM2	23	125505151	125651500	0.020298	rs3808965	0.003519
3	SEC22A	5	122920773	122992982	0.020398	rs1533393	0.01805
14	CDH24	2	23516269	23526747	0.020498	rs3764167	0.0159
17	ABCA5	21	67240575	67323323	0.0206979	rs1550828	0.006675
3	KIAA1524	3	108268717	108308491	0.0206979	rs2305515	0.02684
5	SKIV2L2	24	54603575	54721409	0.0206979	rs2290596	0.01604
8	IKBKB	6	42128819	42190171	0.0206979	rs11986055	0.01046
3	SEMA5B	47	122628039	122747452	0.0207979	rs2276774	0.0005508
4	CC2D2A	31	15471488	15603180	0.0209979	rs767092	0.004012
17	ALOX12B	9	7975953	7991021	0.0210979	rs8066922	0.009723
3	CRTAP	5	33155449	33189265	0.0210979	rs4074418	0.007696
2	LOC389033	3	130680434	130691890	0.0211979	rs10928942	0.01383
6	RUNX2_2	18	45390313	45518819	0.0211979	rs2677099	0.005011
11	RPLP0P2	4	61382507	61406921	0.0212979	rs1495941	0.02002
1	CYP4Z1	4	47533159	47583992	0.0212979	rs10890464	0.02579
15	FGF7	8	49715374	49779523	0.0215978	rs4338740	0.004392
7	PSMG3-AS1	5	1609708	1629261	0.0215978	rs10274145	0.01526
14	ZNF410	3	74353317	74398991	0.0216978	rs2240632	0.01627
10	PTPLA	6	17631957	17659373	0.0217978	rs4237347	0.00935
12	LOC101928290	2	14720665	14772689	0.0217978	rs3811174	0.01269
19	ZNF614	6	52516576	52531680	0.0217978	rs12610953	0.01567
12	HEBP1	5	13127798	13153243	0.0218978	rs850942	0.005232
15	SMAD6	22	66994673	67074337	0.0218978	rs7173030	0.0007841
2	BCL2L11	6	111878490	111926022	0.0218978	rs17041869	0.002446
19	ANKLE1	6	17392453	17398455	0.0219978	rs751599	0.01905
10	ZNF485	3	44101854	44113352	0.0220978	rs2039723	0.009535
14	LOC100128233	2	65679610	65689065	0.0220978	rs8016882	0.01742
12	CHST11	133	104850691	105155792	0.0221978	rs835484	0.0008366
16	DBNDD1	2	90071272	90086539	0.0221978	rs11648785	0.009421
7	LOC100506860	2	130598222	130606705	0.0221978	rs547311	0.02347
15	DNAJA4	9	78556486	78574538	0.0222978	rs2037347	0.004643
10	GOT1	6	101156626	101190530	0.0224978	rs12253861	0.01724
19	ZNF329	2	58637694	58662148	0.0224978	rs159667	0.02049
11	OLFML1	7	7506599	7532606	0.0226977	rs7943470	0.01173
1	GNAT2	3	110145888	110155705	0.0226977	rs17024249	0.01569
8	DEPTOR	39	120885894	121063157	0.0226977	rs9987332	0.000563
7	ZNF815P	7	5862790	5894066	0.0227977	rs308076	0.0105
12	KRT83	8	52708084	52715182	0.0228977	rs11611330	0.005114
1	HAPLN2	2	156589085	156595517	0.0229977	rs3795727	0.02966
2	DCAF17	7	172290760	172341562	0.0229977	rs3795996	0.00547
6	JARID2	69	15246205	15522273	0.0229977	rs2237120	0.002687
22	CECR5	8	17618409	17646177	0.0230977	rs5747007	0.002462
11	MICALCL	34	12308446	12380691	0.0231977	rs10831798	0.002169
6	LTV1	2	144164507	144184943	0.0231977	rs2277078	0.01323
2	LOC100506457	151	12147241	12718474	0.0232977	rs10170534	0.0007849
12	ACSS3	38	81471808	81649582	0.0234977	rs1545082	0.006784
19	CEP89	18	33369903	33462869	0.0234977	rs8107282	0.001991
6	IMPG1	33	76630830	76782395	0.0235976	rs12197455	0.0008378
5	LINC00992	34	116751207	116915439	0.0236976	rs12055168	0.0006585
17	SYNRG	12	35874899	35969486	0.0237976	rs7224979	0.008031
9	ENG	6	130577290	130617052	0.0237976	rs5031024	0.002125
9	FAM122A	2	71394963	71398609	0.0237976	rs8114	0.007967
3	EIF4A2	4	186501360	186507685	0.0238976	rs3816112	0.003287
15	DPP8	8	65737997	65810035	0.0240976	rs3784448	0.0269
1	WNT9A	4	228109164	228135676	0.0240976	rs2527614	0.01515
9	TMEM245	19	111777414	111882225	0.0240976	rs7776	0.001515
10	SORCS1	108	108333420	108924466	0.0241976	rs11193188	0.006784
15	DET1	8	89055713	89089912	0.0242976	rs17196732	0.006418
3	SLC6A11	47	10857916	10980146	0.0244976	rs1807101	0.003562
7	MRPL32	2	42971938	42977453	0.0244976	rs630191	0.01151
5	XRCC4	27	82373316	82649579	0.0245975	rs301287	0.00629
6	MLLT4	13	168227670	168372700	0.0245975	rs1132306	0.005176
1	CTPS1	5	41445006	41478235	0.0247975	rs4132440	0.01603
12	ANKS1B	207	99128568	100378432	0.0248975	rs1275650	0.0004025
19	ZNF702P	6	53471503	53496784	0.0248975	rs1442434	0.0007612
15	PEAK1	17	77400497	77712446	0.0251975	rs11856513	0.01294
2	LOC151475	4	231555635	231565244	0.0251975	rs12476589	0.001954
4	KLHL2	4	166128769	166244308	0.0251975	rs3857013	0.01775
5	OTP	2	76924536	76934522	0.0251975	rs11746588	0.01067
15	CHRNA7	23	32322685	32462384	0.0252975	rs6494223	0.01457
1	THEMIS2	5	28199053	28213196	0.0252975	rs1467465	0.01275
6	PTCHD4	38	47845763	48036425	0.0252975	rs9357566	0.001675
15	HMG20A	7	77713242	77777945	0.0253975	rs7119	0.01893
14	TMEM260	14	57046510	57116232	0.0254975	rs3759670	0.01141
20	UQCC1	5	33890368	33999945	0.0254975	rs4911494	0.007124
2	SCG2	2	224461657	224467217	0.0255974	rs2894511	0.007296
5	PPAP2A	9	54720669	54830906	0.0255974	rs6450312	0.01533
7	SLC37A3	14	140033551	140098350	0.0255974	rs6959565	0.002139
1	LPPR5	19	99355800	99470449	0.0256974	rs10875198	0.0005969
9	CDKN2A	5	21967750	21994490	0.0256974	rs4074785	0.01101
2	GTF2A1L	11	48844918	48906751	0.0257974	rs12713012	0.01741
1	DIO1	8	54359860	54376759	0.0258974	rs2294512	0.03684
20	MAVS	11	3827445	3856770	0.0258974	rs7262903	0.007654
20	WFDC9	2	44236577	44259907	0.0258974	rs6104246	0.0322
19	ZSWIM4	3	13906273	13943044	0.0259974	rs3745454	0.003531
16	CIRH1A	3	69166498	69202937	0.0260974	rs3815821	0.03374
4	SH3RF1	24	170015406	170192249	0.0260974	rs1976543	0.004465
3	DZIP1L	10	137780826	137834451	0.0264974	rs2622717	0.018
4	IGFBP7	38	57897236	57976551	0.0264974	rs11934877	0.0007554
17	HS3ST3B1	13	14204505	14249492	0.0265973	rs1005321	0.01604
2	MTERFD2	4	242026508	242041747	0.0266973	rs1062748	0.00659
1	ADCK3	8	227127937	227175246	0.0267973	rs2777843	0.005108
1	DDR2	28	162602227	162750247	0.0267973	rs6695961	0.005615
8	KCNB2	98	73449625	73850584	0.0267973	rs893891	0.001318
1	GPA33	10	167022081	167059868	0.0268973	rs1887537	0.002297
6	SAPCD1	2	31730772	31732624	0.0268973	rs707937	0.03241
13	GGACT	7	101182417	101241046	0.0269973	rs837309	0.01351
4	FGF5	4	81187741	81212171	0.0269973	rs10212796	0.03786
7	ZNF767P	17	149244244	149321881	0.0269973	rs2373493	0.002488
14	GTF2A1	5	81641795	81687575	0.0270973	rs4899786	0.02055
14	CHMP4A	3	24678786	24683036	0.0271973	rs2295319	0.008327
14	PTGDR	9	52734430	52743442	0.0271973	rs12895027	0.0008709
3	TMF1	6	69068977	69101484	0.0271973	rs937858	0.01708
14	FRMD6-AS2	53	51921229	52066670	0.0275972	rs2064922	0.007111
15	HAPLN3	4	89420518	89438770	0.0277972	rs8039131	0.01992
6	LOC101927950	6	5665219	5695505	0.0278972	rs12174223	0.009631
11	KIAA1377	10	101785745	101871796	0.0279972	rs6590941	0.007542
1	GLIS1	50	53971905	54199877	0.0280972	rs10888802	0.00668
1	LRRC7	43	70225857	70589171	0.0280972	rs17097465	0.0006727
6	PEX6	3	42931610	42946981	0.0281972	rs2395943	0.02113
13	CDK8	6	26828755	26978569	0.0282972	rs10871234	0.01569
10	TUBAL3	2	5435060	5446793	0.0284972	rs10795273	0.02135
9	ZFP37	5	115804094	115819071	0.0285971	rs1411605	0.003521
13	F10	4	113777112	113803843	0.0286971	rs3211719	0.02787
3	LINC01266	31	633787	887698	0.0286971	rs11705707	0.007111
9	GALNT12	15	101569980	101612363	0.0286971	rs10987898	0.004116
10	STOX1	18	70587293	70655209	0.0287971	rs16925839	0.001217
2	TMBIM1	2	219138916	219157280	0.0287971	rs2382817	0.02842
3	RFT1	6	53122500	53164470	0.0287971	rs2581830	0.01812
14	BATF	3	75988783	76013334	0.0288971	rs957370	0.01913
14	RPS6KL1	4	75370656	75389145	0.0288971	rs11159109	0.02518
3	B3GNT5	4	182971031	182991179	0.0289971	rs10049125	0.007592
3	LINC01267	2	14389950	14394068	0.0291971	rs999969	0.004399
14	HEATR4	10	73945188	74025651	0.0292971	rs4899469	0.0231
19	JAK3	4	17935592	17958841	0.0293971	rs2302600	0.003483
1	GNAI3	3	110091185	110138454	0.0293971	rs2301230	0.03077
6	FAM120B	20	170599790	170716159	0.0293971	rs9348264	0.004593
19	TMEM38A	3	16771937	16799816	0.0294971	rs2249827	0.003077
2	HS1BP3	11	20817563	20850864	0.0294971	rs2305458	0.01188
16	PAGR1	2	29827527	29833816	0.029597	rs1057451	0.005336
22	SLC5A4	8	32614462	32651318	0.029597	rs7291681	0.01491
12	ERC1	55	1100403	1605099	0.029697	rs2286033	0.0009443
19	THOP1	3	2785505	2813599	0.029697	rs941410	0.001668
1	TMEM63A	6	226033232	226070420	0.029797	rs360097	0.01459
2	DCTN1	4	74588280	74619214	0.029897	rs6740802	0.01111
2	TGFBRAP1	19	105880846	105946171	0.029897	rs12476649	0.001712
5	NADK2	8	36192690	36242381	0.029997	rs1364017	0.006264
7	SNX8	10	2291404	2354099	0.029997	rs4442022	0.005845
16	SMPD3	17	68392229	68482409	0.030097	rs12599487	0.00252
19	ZNF224	5	44598481	44612479	0.030097	rs4802207	0.0124
16	GLYR1	4	4853203	4897303	0.030197	rs2075467	0.01661
18	PARD6G-AS1	2	77905806	77936315	0.030397	rs1050919	0.04841
5	LOC101926905	3	140425789	140457609	0.030397	rs246584	0.01682
8	CLVS1	29	62200524	62414204	0.030397	rs2610520	0.0003044
14	FERMT2	11	53323988	53417815	0.030497	rs17125944	0.006416
1	EVI5	18	92974252	93257961	0.030497	rs1337107	0.01584
1	LINC01222	3	198961717	198988093	0.030497	rs12757682	0.03193
20	KCNG1	2	49620192	49639675	0.030497	rs6091248	0.01678
2	CLEC4F	5	71035775	71047732	0.0305969	rs2075221	0.03626
2	DDX18	5	118572254	118589953	0.0306969	rs17047460	0.03936
2	SMEK2	13	55774427	55844860	0.0306969	rs10427222	0.01523
14	TMED10	2	75598170	75643349	0.0307969	rs13099	0.03071
1	VANGL1	31	116184573	116240845	0.0307969	rs12134884	0.004222
21	LINC00113	6	29094697	29123552	0.0308969	rs8127639	0.011
2	ARHGAP15	123	143886898	144525921	0.0309969	rs6430024	0.0004393
9	PRDM12	6	133539980	133558384	0.0309969	rs7024667	0.005845
12	TMEM116	2	112369086	112451023	0.0311969	rs3752630	0.03005
11	IL10RA	2	117857105	117872199	0.0312969	rs9610	0.04663
3	LRRC34	2	169511215	169530574	0.0312969	rs9878797	0.01434
1	MAP3K6	3	27681669	27693337	0.0313969	rs12727507	0.03564
10	AIFM2	6	71872022	71892690	0.0315968	rs10823484	0.003362
16	AFG3L1P	4	90038987	90067195	0.0316968	rs4408545	0.006807
16	CX3CL1	2	57406413	57418956	0.0316968	rs170364	0.02637
20	NDUFAF5	6	13765671	13799067	0.0316968	rs2064644	0.009745
6	C6orf163	5	88054570	88075181	0.0316968	rs406981	0.0263
1	IL10	4	206940947	206945839	0.0317968	rs3021094	0.01815
2	LOC284950	6	86042252	86053911	0.0317968	rs10445963	0.01431
9	CDKN2B-AS1	26	21994789	22121093	0.0317968	rs7049105	0.006428
17	MAP3K14	6	43340485	43394430	0.0319968	rs2074292	0.03275
19	CYP4F22	13	15619335	15663128	0.0319968	rs4310987	0.01246
1	TCTEX1D1	7	67218139	67244730	0.0319968	rs6588219	0.008929
4	RGS12	26	3315873	3441640	0.0320968	rs2749775	0.006484
1	GBP7	3	89597433	89641723	0.0321968	rs10158415	0.02303
4	ANKRD17	5	73940501	74124502	0.0323968	rs9291182	0.006553
8	XKR9	5	71581599	71648177	0.0323968	rs268652	0.009713
5	TCERG1	6	145826872	145891069	0.0324968	rs7730979	0.02047
17	ITGA3	6	48133339	48167849	0.0326967	rs880043	0.008536
14	CCNK	2	99947738	99977852	0.0327967	rs2069492	0.03356
5	DHX29	7	54552072	54603521	0.0327967	rs170779	0.01782
4	RRH	3	110749149	110765861	0.0328967	rs4698795	0.01932
8	DPY19L4	12	95732102	95806076	0.0329967	rs4478541	0.008104
8	ZHX1-C8orf76	2	124238428	124286727	0.0329967	rs1670177	0.009946
3	FAM19A4	43	68780914	68981761	0.0330967	rs17048119	0.002229
15	MTMR10	14	31231143	31283807	0.0331967	rs16956422	0.02557
6	DTNBP1	17	15523031	15663289	0.0331967	rs9396592	0.005935
11	OR51I1	2	5461771	5462783	0.0332967	rs1498486	0.02077
19	FUT2	2	49199227	49209191	0.0333967	rs16982241	0.01042
19	SGTA	5	2754711	2783354	0.0333967	rs878893	0.0156
10	TLX1	5	102891060	102897546	0.0334967	rs1051723	0.01787
12	FOXM1	2	2966846	2986321	0.0334967	rs3829865	0.01118
12	GLIPR1L2	2	75784849	75826177	0.0334967	rs11180484	0.03502
3	LOC101927123	15	127041149	127109513	0.0334967	rs11709061	0.005037
10	TCTN3	5	97423152	97453900	0.0335966	rs10748638	0.03263
21	HSPA13	5	15743436	15755509	0.0336966	rs2822648	0.004442
3	PTPLB	9	123213362	123303924	0.0336966	rs1965290	0.02991
7	UBE2D4	8	43966034	43995735	0.0336966	rs2595646	0.006173
14	JPH4	2	24037243	24048009	0.0337966	rs11844366	0.01028
5	CARD6	2	40841409	40855456	0.0337966	rs323565	0.02912
16	LOC100506172	13	73420703	73455295	0.0339966	rs4888252	0.0006369
11	CHRDL2	6	74407473	74442227	0.0340966	rs10219235	0.0004878
12	PIK3C2G	72	18414473	18801352	0.0340966	rs11044004	1.28e-05
9	PTPLAD2	14	21006364	21031635	0.0340966	rs1112167	0.007453
9	TDRD7	10	100174301	100258405	0.0341966	rs3214070	0.02158
15	THBS1	2	39873279	39889668	0.0342966	rs1478604	0.02682
8	MCM4	2	48872762	48890719	0.0342966	rs1894311	0.05643
8	ZNF707	2	144766621	144777555	0.0342966	rs11136316	0.03354
1	FCRLB	8	161691333	161697933	0.0343966	rs4657093	0.006342
2	STK36	4	219536748	219567440	0.0343966	rs2303565	0.02343
2	STON1-GTF2A1L	58	48757063	49003656	0.0343966	rs11125179	0.01547
19	CATSPERG	3	38826442	38861589	0.0345965	rs3745953	0.05227
5	SV2C	68	75379304	75621416	0.0345965	rs183766	0.01471
16	MMP2	8	55513080	55540586	0.0346965	rs1992116	0.009569
8	C8orf22	2	49966894	49988642	0.0347965	rs10504070	0.03375
19	PPP1R15A	3	49375648	49379319	0.0348965	rs611251	0.03012
8	GML	7	143916216	143928262	0.0349965	rs4736338	0.009183
17	TBX4	10	59533806	59561664	0.0350965	rs3785828	0.004079
3	FANCD2	8	10068112	10143614	0.0350965	rs2272123	0.0197
4	LETM1	2	1813205	1857974	0.0350965	rs11938463	0.03473
15	OIP5	2	41601465	41624819	0.0351965	rs9302109	0.00956
19	OLFM2	12	9964393	10047070	0.0351965	rs10426341	0.03097
1	LINC00862	6	200311671	200342920	0.0351965	rs2808500	0.01076
22	ARHGAP8	50	45148437	45258664	0.0351965	rs4823400	0.001943
15	IQGAP1	21	90931472	91045475	0.0353965	rs2589948	0.006644
3	LOC100132146	5	46653924	46668033	0.0354965	rs9880885	0.01379
2	LOC100144595	13	155292364	155313950	0.0355964	rs707094	0.02053
9	TXNDC8	10	113065866	113100164	0.0356964	rs10980327	0.00942
4	HAUS3	3	2230095	2243860	0.0357964	rs11937432	0.02247
6	THEMIS	33	128029338	128239776	0.0357964	rs270050	0.002428
8	ADAM7	9	24298508	24367077	0.0359964	rs7822070	0.006557
6	UQCC2	5	33664537	33679528	0.0360964	rs594223	0.002615
7	ELMO1	165	36892510	37488929	0.0360964	rs1420423	0.003918
12	ANO2	111	5671816	6055398	0.0361964	rs7305676	0.005064
14	CHURC1	3	65381078	65402084	0.0361964	rs10138506	0.02247
9	IL33	10	6215785	6257983	0.0361964	rs12551256	0.0104
11	PPP2R1B	2	111597631	111637169	0.0362964	rs669778	0.02592
1	OR10R2	3	158449667	158450675	0.0363964	rs6679056	0.02137
21	C21orf2	3	45748826	45759285	0.0364964	rs3761392	0.01834
8	ADAM32	16	38965049	39142436	0.0364964	rs7830326	0.01363
2	LHCGR	27	48913912	48982880	0.0365963	rs11125179	0.01547
12	GAS2L3	11	100967488	101018685	0.0366963	rs12371477	0.01279
15	ZNF592	9	85291817	85349663	0.0366963	rs10438428	0.009207
4	USO1	9	76649705	76735442	0.0367963	rs4859406	0.02143
19	MAP2K7	2	7968764	7979363	0.0368963	rs3745386	0.01445
12	ALDH2	9	112204690	112247789	0.0370963	rs4767939	0.01144
14	PNP	4	20937537	20946165	0.0370963	rs1049564	0.02355
14	PPM1A	7	60712469	60765805	0.0371963	rs1887104	0.01151
1	PIGK	12	77554666	77685132	0.0371963	rs12035349	0.008855
8	TMEM55A	7	92006501	92053203	0.0371963	rs10112439	0.008677
2	PASK	9	242045513	242089394	0.0372963	rs12616483	0.009315
19	SIGLECL1	4	51754331	51772582	0.0373963	rs1875425	0.007183
20	DTD1	17	18568555	18744560	0.0373963	rs6136453	0.009693
14	FRMD6	78	51955838	52197444	0.0374963	rs2019018	0.004293
14	SETD3	6	99864082	99947226	0.0374963	rs11624183	0.03351
9	PDCD1LG2	18	5510544	5571282	0.0374963	rs12003838	0.0009657
1	WNT3A	7	228194722	228248972	0.0375962	rs3121310	0.01034
12	KLRF2	6	10034087	10048432	0.0376962	rs11053499	0.02024
15	USP50	4	50792758	50838902	0.0376962	rs12593931	0.02358
16	FAM192A	4	57186377	57219976	0.0376962	rs4783980	0.02959
1	ACTN2	29	236849753	236927927	0.0376962	rs10925211	0.003705
6	MLIP-IT1	4	53863687	53871950	0.0376962	rs17625076	0.01499
3	TGFBR2	35	30647993	30735633	0.0377962	rs4583693	0.01055
6	MB21D1	2	74134855	74162043	0.0377962	rs610913	0.01148
20	LOC729296	7	58662740	58676442	0.0378962	rs577624	0.01904
8	CHD7	24	61591323	61780586	0.0378962	rs4540437	0.003752
13	LINC00571	17	38624953	38717369	0.0380962	rs12050013	0.01748
17	SEZ6	6	27281946	27333458	0.0380962	rs7225455	0.03047
3	CDV3	3	133292433	133309118	0.0381962	rs6781238	0.02123
5	CDC25C	6	137620953	137674044	0.0382962	rs3734166	0.01732
12	TCP11L2	8	106696568	106740792	0.0383962	rs2250441	0.002789
2	ROCK2	10	11321777	11484711	0.0383962	rs13404430	0.01809
11	HEPHL1	16	93754377	93847374	0.0384962	rs2949856	0.02236
15	CIB1	3	90773476	90808991	0.0384962	rs1533327	0.01431
22	LZTR1	8	21336557	21353326	0.0384962	rs7289487	0.01089
11	FLRT1	8	63871361	63886645	0.0385961	rs614035	0.009205
11	MMP8	6	102582525	102595685	0.0386961	rs3765620	0.01834
14	RIN3	53	92980124	93155334	0.0386961	rs749647	0.001252
14	STON2	25	81726993	81893748	0.0386961	rs2146244	0.0141
2	GPR1	16	207040041	207082771	0.0386961	rs2058709	0.01537
13	CLN5	4	77566058	77576652	0.0388961	rs9573972	0.02146
15	ACSBG1	23	78463186	78527049	0.0388961	rs11629576	0.004554
10	PRKG1	328	52750910	54058110	0.0390961	rs12763079	0.0008436
17	PHF12	2	27232270	27278508	0.0390961	rs6505098	0.01913
19	LTBP4	5	41099071	41135725	0.0390961	rs3786527	0.01435
5	SREK1	5	65440045	65479444	0.0390961	rs1643415	0.01173
12	NECAP1	2	8234806	8250373	0.0391961	rs2241025	0.04168
11	LPXN	2	58294343	58345639	0.0393961	rs1944053	0.04484
16	C16orf72	3	9185536	9213555	0.0393961	rs9039	0.003838
5	FAXDC2	2	154198051	154230213	0.0393961	rs12187921	0.03248
6	DEK	5	18224399	18264799	0.0393961	rs1013062	0.02086
14	PRKCH	74	61788514	62017698	0.0394961	rs1886461	0.001262
15	DENND4A	12	65952956	66084631	0.039596	rs7180542	0.04597
9	IGFBPL1	10	38406524	38424444	0.039596	rs1467575	0.02271
3	FANCD2OS	5	10123003	10149915	0.039796	rs2272123	0.0197
5	LOC101927023	3	111563979	111593006	0.039896	rs11741929	0.003285
1	TNFRSF1B	12	12227059	12269277	0.039996	rs976881	0.00101
14	NEK9	6	75548817	75593778	0.040096	rs96358	0.03155
7	NRF1	29	129251554	129396922	0.040096	rs11766629	0.006527
20	SRXN1	3	627267	634014	0.040196	rs6107696	0.05026
4	GRIA2	5	158141735	158287226	0.040196	rs9683871	0.03867
1	LOC440700	3	165667986	165679199	0.040496	rs2090281	0.01823
1	CLIC4	3	25071759	25170815	0.0405959	rs4306080	0.02153
11	LOC100506258	20	7458867	7487066	0.0406959	rs10839786	0.01154
8	VPS13B	48	100025493	100889814	0.0406959	rs4735627	0.007012
5	MAPK9	17	179660594	179719071	0.0407959	rs13435	0.01652
11	CARNS1	2	67183148	67193078	0.0408959	rs1790733	0.01605
3	SLC38A3	2	50242678	50258411	0.0408959	rs2236941	0.007254
13	MIPEPP3	14	21872263	21967061	0.0409959	rs7336525	0.03282
14	YLPM1	4	75230068	75304013	0.0410959	rs2111705	0.02053
9	TRMT10B	4	37753799	37778969	0.0410959	rs4878174	0.01809
2	PRKCE	210	45879042	46415129	0.0411959	rs13024907	0.002371
5	IPO11-LRRC70	2	61874561	61924416	0.0412959	rs16890857	0.02139
7	MIR548F3	61	147592370	147797648	0.0412959	rs4571660	0.004352
11	MMP20	15	102447565	102496063	0.0413959	rs10895322	0.01824
12	FLJ41278	14	65277553	65371302	0.0415958	rs464817	0.01452
15	SLC24A1	5	65914269	65948598	0.0415958	rs3743171	0.03333
6	L3MBTL3	23	130339727	130462594	0.0416958	rs9388766	0.002999
3	LINC01014	8	178136988	178175093	0.0417958	rs9868767	0.009569
15	PIF1	2	65107828	65117867	0.0418958	rs8036568	0.04376
22	MMP11	2	24115035	24126503	0.0420958	rs738791	0.05801
7	DYNC1I1	76	95401817	95739634	0.0421958	rs995596	0.001196
19	KIAA0355	9	34745455	34846471	0.0422958	rs1669261	0.02092
14	LINC00643	9	62584074	62600903	0.0423958	rs7161322	0.01677
21	IGSF5	29	41117333	41174023	0.0423958	rs456800	0.01229
16	CCL17	5	57438678	57449974	0.0424958	rs223900	0.02155
19	CYP2B6	15	41497203	41524301	0.0424958	rs8192718	0.01346
1	DHRS3	15	12627938	12677737	0.0424958	rs11589038	0.0001522
14	RDH12	4	68168602	68201168	0.0425957	rs1555193	0.002474
3	EIF2B5	2	183852809	183863099	0.0426957	rs843358	0.04148
7	CHST12	3	2443194	2474216	0.0426957	rs2270005	0.01738
11	NAP1L4	8	2965659	3013607	0.0428957	rs11602817	0.02525
3	GRK7	4	141497042	141535892	0.0429957	rs11921607	0.01355
8	LOC100505739	5	70337105	70360479	0.0429957	rs3780006	0.01175
6	SLC22A7	3	43265997	43273276	0.0430957	rs2841648	0.0309
6	LOC730101	2	52529198	52533951	0.0431957	rs9370138	0.009722
19	PVR	4	45147097	45169428	0.0432957	rs203713	0.05192
19	VSTM1	9	54544079	54567207	0.0432957	rs10416558	0.0009358
1	SLC5A9	7	48688356	48714316	0.0432957	rs11205459	0.02915
7	APTR	2	77313167	77326662	0.0433957	rs4727461	0.04555
16	N4BP1	5	48572636	48644120	0.0437956	rs11649236	0.04337
3	ALDH1L1-AS1	8	125822482	125826912	0.0437956	rs4646748	0.03096
5	ERGIC1	40	172261222	172379688	0.0437956	rs792965	0.01045
9	RNF38	6	36336398	36401195	0.0437956	rs10758370	0.01476
19	CEACAM18	7	51981896	51993859	0.0438956	rs12610545	0.01123
9	GLDC	25	6532463	6645692	0.0439956	rs6477088	0.02167
17	MAP2K4	13	11924134	12047148	0.0440956	rs11654465	0.01492
4	LIAS	5	39460643	39479271	0.0440956	rs2687975	0.01751
10	GTPBP4	5	1034348	1063708	0.0441956	rs2306408	0.01394
20	EDN3	5	57875498	57901047	0.0441956	rs197173	0.03436
7	ZNF117	2	64434829	64451414	0.0441956	rs1852015	0.03566
13	VWA8-AS1	2	42535304	42555701	0.0442956	rs12585194	0.04208
15	SHC4	46	49115933	49255641	0.0442956	rs10519193	0.009691
17	AATF	8	35306174	35414171	0.0443956	rs1634332	0.03468
2	GPR17	8	128403438	128410213	0.0443956	rs2243934	0.01012
14	FNTB	8	65453506	65529370	0.0444956	rs12587546	0.01908
2	CMPK2	3	6980683	7006766	0.0444956	rs10495545	0.02778
11	GLB1L2	15	134201767	134246218	0.0445955	rs1258854	0.0205
13	LINC00550	8	69435416	69459457	0.0445955	rs9592570	0.03458
12	HELB	9	66696334	66737423	0.0446955	rs1168312	0.002641
1	ZRANB2-AS1	3	71512188	71532865	0.0446955	rs4520371	0.005133
3	ALDH1L1-AS2	13	125898907	125929011	0.0446955	rs13069815	0.001804
13	LINC00442	2	19582398	19586774	0.0447955	rs4770584	0.03313
9	VAV2	69	136627015	136857446	0.0447955	rs608968	0.0003912
11	LDHC	4	18433852	18472793	0.0448955	rs11024651	0.01857
2	NDUFAF7	3	37458773	37476303	0.0448955	rs12622740	0.04797
2	IKZF2	28	213864410	214016333	0.0449955	rs3768790	0.01861
14	GPR68	5	91698875	91720224	0.0450955	rs933528	0.02204
19	LONP1	4	5691844	5720463	0.0450955	rs2436514	0.03205
21	KCNJ15	20	39601836	39673746	0.0451955	rs2836293	0.01121
9	LINC00475	2	94903748	94921890	0.0452955	rs3858095	0.05039
11	MPPED2	45	30406039	30607930	0.0454955	rs7113764	0.005318
22	PRR5-ARHGAP8	74	45098381	45258664	0.0454955	rs4823400	0.001943
13	LOC101926897	6	58739960	58783617	0.0455954	rs9569833	0.04084
3	EHHADH-AS1	4	184880688	184909743	0.0456954	rs2377371	0.04697
20	PYGB	4	25228705	25278648	0.0458954	rs11697384	0.01061
6	SH3BGRL2	21	80340999	80413369	0.0460954	rs12216227	0.0145
6	SLC26A8	12	35911290	35992413	0.0460954	rs743923	0.01049
1	GFI1	2	92940317	92952433	0.0461954	rs4970702	0.01957
3	DBR1	2	137879829	137893791	0.0461954	rs811811	0.04349
4	QDPR	5	17488015	17513857	0.0461954	rs1031326	0.02191
19	ZNF223	2	44556163	44572147	0.0462954	rs4239528	0.02829
7	HERPUD2	10	35672269	35734772	0.0462954	rs3779234	0.02004
12	RND1	2	49250915	49259653	0.0464954	rs2453488	0.0182
2	STK16	2	220110191	220115059	0.0464954	rs8447	0.02974
11	CNGA4	2	6260321	6265707	0.0465953	rs7129498	0.02435
12	CLEC4E	2	8685900	8693558	0.0467953	rs10841845	0.03137
13	LINC00400	20	43687300	43733602	0.0467953	rs11147902	0.01344
14	EXD2	4	69658193	69710737	0.0467953	rs3211166	0.02657
1	GRIK3	33	37261127	37499844	0.0467953	rs1027599	0.004643
12	HTR7P1	4	13153375	13157764	0.0468953	rs1291362	0.03077
18	LINC00470	7	1268311	1359630	0.0468953	rs987611	0.02028
19	LOC100379224	4	44609491	44617336	0.0468953	rs2061332	0.02688
5	LINC01265	3	38710468	38720375	0.0468953	rs4555854	0.02039
10	PITRM1	22	3179918	3215033	0.0470953	rs3758630	0.01738
22	PARVB	71	44395090	44565112	0.0470953	rs2401520	0.008273
6	SLC29A1	4	44187241	44201888	0.0471953	rs693955	0.02399
22	NCAPH2	5	50946644	50963209	0.0472953	rs140524	0.01434
3	HRG	7	186383746	186396023	0.0472953	rs2555515	0.0008418
19	PDE4C	6	18318770	18359010	0.0473953	rs2074973	0.02103
11	GLB1L3	15	134146274	134189458	0.0474953	rs1669258	0.003037
12	FOXN4	5	109715782	109747025	0.0476952	rs7967204	0.01369
3	MCF2L2	52	182895791	183146057	0.0476952	rs9873383	0.00115
6	TMEM200A	11	130687425	130764210	0.0476952	rs12202427	0.0278
9	APBA1	47	72042448	72287275	0.0476952	rs1330327	0.01118
12	LOC101927292	4	50305735	50320122	0.0477952	rs184172	0.01987
20	LINC00658	2	5412602	5426394	0.0478952	rs2295516	0.03682
19	C19orf40	4	33463147	33467960	0.0479952	rs3816032	0.02104
15	LOC101929743	4	89128801	89148341	0.0480952	rs12324548	0.01373
2	LOC101927924	4	130680749	130704276	0.0480952	rs10928942	0.01383
2	TNFAIP6	4	152214105	152236562	0.0480952	rs1046668	0.01626
6	LOC285819	7	26472171	26482737	0.0480952	rs12208272	0.03501
14	ARID4A	4	58765221	58840451	0.0481952	rs941752	0.02201
9	ADAMTSL1	186	18474078	18910947	0.0483952	rs7859917	0.004878
5	LOC728613	2	1597671	1634120	0.0484952	rs2962033	0.05724
13	DLEU7-AS1	5	51381990	51424041	0.0485951	rs2126366	0.02989
11	NRXN2	6	64373645	64490660	0.0487951	rs17146121	0.002252
20	TMC2	34	2517252	2622430	0.0488951	rs6083911	0.006239
12	NR1H4	12	100867550	100957645	0.0490951	rs4764980	0.02083
1	METTL11B	2	170115187	170136923	0.0492951	rs10919307	0.02621
7	SLC25A13	28	95749531	95951459	0.0492951	rs3757698	0.02577
15	ARPP19	2	52839431	52861213	0.0493951	rs1568954	0.03287
3	NEK11	28	130745693	131069309	0.0493951	rs9868843	0.005404
1	ADCY10	30	167778624	167883453	0.049695	rs203849	0.0006926
2	DYSF	75	71680752	71913893	0.049695	rs7568834	0.000304
2	RBM44	6	238707387	238751451	0.049695	rs1198819	0.04691
5	GFM2	5	74017028	74063196	0.049695	rs10942719	0.02475
16	NARFL	2	779768	790997	0.049895	rs11864516	0.02332
1	ADSS	13	244571793	244615436	0.049895	rs12032765	0.003651
20	ZBTB46	12	62375020	62436856	0.049895	rs2315654	0.03666
3	AADACL2	5	151451703	151475556	0.049895	rs1401961	0.02652
8	ADAMDEC1	4	24241797	24263526	0.049895	rs12334642	0.008939
8	PNOC	8	28174648	28200871	0.049895	rs2722898	0.01432
4	HTT	12	3076236	3245687	0.049995	rs2276881	0.002111

## Sheet: S5 Table
S5 Table. Results of known SLE susceptible SNPs in this LN GWAS
SNP	Locus	Position	GENE	Minor allele	P	OR
rs4649203	1p36.11	24519920	IL28RA	G	0.4203	1.075
rs3828069	1p31.3	67839573	IL12RB2	C	0.3327	0.9173
rs1801274	1q23.3	161479745	FCGR2A	G	0.6512	0.9602
rs1234315	1q25.1	173178463	TNFSF4	C	0.4083	0.9296
rs2205960	1q25.1	173191475	TNFSF4	T	0.5479	1.057
rs704840	1q25.1	173226195	TNFSF4	G	0.7176	0.9689
rs1418190	1q25.1	173361979	TNFSF4	C	0.5396	1.061
rs4916219	1q25.1	173373183	TNFSF4	T	0.718	1.037
rs10911628	1q25.3	184649503	EDEM3	A	0.3177	0.8279
rs3024505	1q32.1	206939904	IL10	A	0.3929	0.8329
rs9782955	1q42.3	236039877	LYST	T	0.008128	1.498
rs7579944	2p23.1	30445026	LBH	C	0.8838	0.9867
rs906868	2p23.1	30448344	LBH	T	0.8496	0.9828
rs17321999	2p23.1	30479857	LBH	A	0.8402	1.023
rs13385731	2p22.3	33701890	RASGRP3	C	0.8794	1.022
rs4852324	2p13.1	74202578	DGUOK-TET3	C	0.4823	0.9267
rs6705628	2p13.1	74208362	DGUOK-TET3	T	0.3223	0.8936
rs2322659	2q21.3	136555659	LCT	C	0.003675	0.7693
rs3754689	2q21.3	136590746	LCT	T	0.06229	1.183
rs2111485	2q24.2	163110536	IFIH1	G	0.2113	1.154
rs1990760	2q24.2	163124051	IFIH1	T	0.2238	1.14
rs3821236	2q32.3	191902758	STAT4	G	0.2775	0.9076
rs10168266	2q32.3	191935804	STAT4	T	0.2123	1.122
rs7601754	2q32.3	191940451	STAT4	G	0.8907	0.9791
rs10931481	2q32.3	191954852	STAT4	A	0.1852	0.8873
rs7574865	2q32.3	191964633	STAT4	T	0.09287	1.167
rs3768792	2q34	213871709	IKZF2	G	0.04398	0.8065
rs6445975	3p14.3	58370177	ABHD6-PXK	G	0.08355	0.832
rs12494314	3q13.33	119122820	TMEM39A	C	0.946	0.9934
rs1132200	3q13.33	119150836	TMEM39A	T	0.2843	0.8349
rs6804441	3q13.33	119260944	CD80	G	0.9484	1.006
rs2222631	3q13.33	119272391	CD80	G	0.9335	0.9927
rs10936599	3q26.2	169492101	MYNN	C	0.8194	0.9802
rs6793295	3q26.2	169518455	LRRC34	T	0.159	0.8752
rs6762714	3q28	188470238	LPP, TPRG1-AS1	C	0.1484	0.8392
rs340630	4q21.3	87958395	AFF1	G	0.01735	1.238
rs10028805	4q24	102737250	BANK1	A	0.312	1.104
rs10516487	4q24	102751076	BANK1	A	0.6418	0.9364
rs7726414	5q31.1	133431834	TCF7-SKP1	T	0.5016	1.111
rs244689	5q31.1	133422816	TCF7-PPP2CA	A	0.04137	1.203
rs10036748	5q33.1	150458146	TNIP1	C	0.6266	1.054
rs2431697	5q33.3	159879978	MIR146A	C	0.1016	0.8144
rs2246618	6p21.32-33	31478986	MICB	T	0.8442	0.9805
rs8192591	6p21.32-33	32185796	NOTCH4	T	0.7774	1.109
rs9270984	6p21.32-33	32573991	HLA-DRB1	T	0.5951	1.057
rs9271366	6p21.32-33	32586854	DRB1-DQA1	G	0.553	1.068
rs2187668	6p21.32-33	32605884	HLA-DQA1	T	0.9059	1.022
rs9275572	6p21.32-33	32678999	HLA region	A	0.7527	1.03
rs2051549	6p21.32-33	32730086	HLA-DQA2	G	0.477	1.108
rs3748079	6p21.31	33588147	ITPR3	T	0.5565	0.9324
rs9462027	6p21.31	34797241	UHRF1BP1	A	0.9508	0.9931
rs3734266	6p21.31	34823187	UHRF1BP1	C	0.612	1.059
rs13205210	6p21.31	34831856	UHRF1BP1	C	0.9396	1.009
rs10807150	6p21.31	35272274	DEF6	C	0.966	1.004
rs597325	6q15	91002494	BACH2	A	0.7006	1.035
rs548234	6q21	106568034	PRDM1-ATG5	C	0.2498	1.118
rs6568431	6q21	106588806	PRDM1-ATG5	A	0.1219	1.155
rs2230926	6q23.3	138196066	TNFAIP3	G	0.4418	0.8792
rs4917014	7p12.2	50305863	IKZF1	G	0.03028	1.249
rs13238909	7q11.22	67076373	ST3AGL4	A	0.5132	1.13
rs1167796	7q11.23	75173180	Multiple genes	A	0.978	1.003
rs6964720	7q11.23	75180344	HIP1	G	0.4114	1.083
rs729302	7q32.1	128568960	TNPO3-IRF5	C	0.6162	1.05
rs4728142	7q32.1	128573967	TNPO3-IRF5	A	0.4736	0.9181
rs6985109	8p23.1	10761585	XKR6	A	0.1144	1.62
rs4240671	8p23.1	10767748	XKR6	A	0.2071	1.635
rs11783247	8p23.1	10788875	XKR6	T	0.6482	1.13
rs6984496	8p23.1	10796093	XKR6	T	0.638	1.129
rs7836059	8p23.1	11272164	C8orf12	A	0.9208	0.9843
rs2428	8p23.1	8641145	MFHAS1	C	0.667	1.059
rs17807624	8p23.1	11463015	LINC00208/GATA4	C	0.5453	0.9073
rs12680762	8p23.1	11332026	FAM167A	C	0.4866	0.9138
rs7812879	8p23.1	11340181	BLK	T	0.4177	0.9094
rs2254546	8p23.1	11343680	BLK	A	0.3817	0.9033
rs2736340	8p23.1	11343973	BLK	C	0.7505	0.9661
rs13277113	8p23.1	11349186	BLK	G	0.8948	1.014
rs2618479	8p23.1	11355821	BLK	A	0.6392	0.9493
rs2248932	8p23.1	11391650	BLK	G	0.8962	1.014
rs7829816	8q12	56849386	LYN	G	0.5838	1.171
rs11788118	9q22.33	102337331	AK057451	A	0.2766	1.251
rs877819	10q11.23	50042951	WDFY4	A	0.1832	1.156
rs2663052	10q11.23	50069395	WDFY4	G	0.6668	1.04
rs1913517	10q11.23	50119054	LRRC18-WDFY4	A	0.6323	1.045
rs4948496	10q21.2	63805617	ARID5B	T	0.9224	1.009
rs4963128	11p15.5	589564	KIAA1542 (PHRF1)	T	0.7365	1.069
rs2732547	11p13	35088683	CD44	T	0.2956	1.12
rs3794060	11q13.4	71187679	DHCR7,NADSYN1	T	0.654	0.9605
rs11603023	11q23.3	118486067	PHLDB1	T	0.422	0.9226
rs4639966	11q23.3	118573519	Multiple genes	C	0.6767	0.9613
rs10892301	11q23.3	118735476	CXCR5	A	0.7218	0.9687
rs6590330	11q24.3	128311059	ETS1	A	0.4179	1.075
rs12822507	12p13.2	12773521	CREBL2	G	0.1712	0.8803
rs10845606	12p13.1	12834894	GPR19	A	0.1343	0.8564
rs34330	12p13.1	12870695	CDKN1B	T	0.07681	0.8533
rs4622329	12q23.2	102321935	DRAM1	G	0.04509	0.8364
rs1059312	12q24.32	129278864	SLC15A4	G	0.6441	0.9602
rs10847697	12q24.32	129299385	SLC15A4	A	0.8361	1.021
rs1385374	12q24.32	129300694	SLC15A4	T	0.8718	1.016
rs7329174	13q14.11	41558110	ELF1	G	0.1724	0.8667
rs8016947	14q13.2	35832666	NFKBIA	T	0.668	1.038
rs4902562	14q24.1	68731458	RAD51B	G	0.4958	0.9402
rs8035957	15q14	38838264	RASGRP1	T	0.5274	1.059
rs11073328	15q14	38764843	FAM98B	T	0.6446	0.9393
rs8023715	15q26.2	97607681	SPATA8	A	0.5076	0.8585
rs12599402	16p13	11189888	CLEC16A	C	0.09483	0.8544
rs2731783	16q21	58253460	CSNK2A2	A	0.2807	1.103
rs16972959	16p11.2	23901376	PRKCB	A	0.7424	0.9659
rs7197475	16p11.2	30642867	Multiple genes	T	0.8777	1.023
rs223881	16q13	57386566	CCL22	T	0.1065	0.8661
rs1170426	16q22.1	68603798	ZFP90	C	0.311	1.121
rs2041670	16p13.13	11174652	CLEC16A	A	0.4079	0.9138
rs2934498	16q24.1	85968282	IRF8	G	0.1283	0.8679
rs11644034	16q24.1	85972612	IRF8	A	0.8204	0.9629
rs2280381	16q24.1	86018633	IRF8	C	0.2893	0.8615
rs2286672	17p13.2	4712617	PLD2	T	0.8145	1.022
rs763361	18q22.2	67531642	CD226	T	0.3758	1.083
rs3093030	19p13	10397403	ICAM1–ICAM4–ICAM5	T	0.01179	1.309
rs13344313	19p13.11	18517767	LRRC25	A	0.8473	1.026
rs280519	19p13.2	10472933	TYK2	A	0.5357	1.058
rs11697848	20q13.13	48575315	RNF114	T	0.3355	0.8444
rs463426	22q11.21	21809185	HIC2-UBE2L3	C	0.5713	1.053
rs131654	22q11.21	21917190	HIC2-UBE2L3	G	0.3438	1.091
rs2298428	22q11.21	21982892	YDJC	T	0.7993	1.023
rs11679484	2q33.1	198921604	PLCL1	A	0.1286	1.17
rs4690055	4p16.3	2748663	TNIP2	A	0.2395	1.115
rs4697651	4p16.1	10721433	CLNK, MIR572	T	0.8243	0.9712
rs13260060	8q13.3	71218360	NCOA2	A	0.57	0.9496
rs2445610	8q24.21	128197088	PRNCR1, CASC19	G	0.7849	1.025
rs1405209	9q22.33	102585545	NR4A3	C	0.6539	0.9514
rs12148050	14q32.32	103263788	TRAF3	A	0.06857	1.177
rs10018951	4q35.1	184609373	TRAPPC11	T	0.6823	0.9567
rs7572733	2q33.1	198929806	PLCL1	T	0.07015	1.201
rs7565158	2q34	213593970	ERBB4	T	0.8487	0.9836
rs6533951	4q21.21	79644279	LINC01094	A	0.4691	0.9339
rs6841907	4q21.23	84146996	COQ2	C	0.7463	0.9686
rs9488914	6q22.1	116690849	DSE	C	0.5977	0.9296
rs9322454	6q25.2	154570651	IPCEF1	G	0.4683	0.9356
rs11117432	16q24.1	86019271	IRF8	A	0.03918	0.7024
rs12461589	19q13.11	33072768	PDCD5	T	0.2716	0.8919
rs4801882	19q13.41	52127053	SIGLEC5	G	0.8689	1.014
rs1578624	1q25.1	173368671	PRDX6	C	0.7001	1.037
rs205284	6p21.31	34551912	C6orf106	T	0.5239	1.08
rs3734261	6p21.31	34840398	UHRF1BP1	A	0.3826	1.111
rs428073	12q24.23	118682751	TAOK3	C	0.6543	1.046
Notes: SNP: single-nucleotide polymorphism;
